# Supplementary figures and images for: Different B cell subpopulations show distinct patterns in their IgH repertoire metrics
Source: eLife journal article supplement (doi:10.7554/elife.73111), 2021-10-18

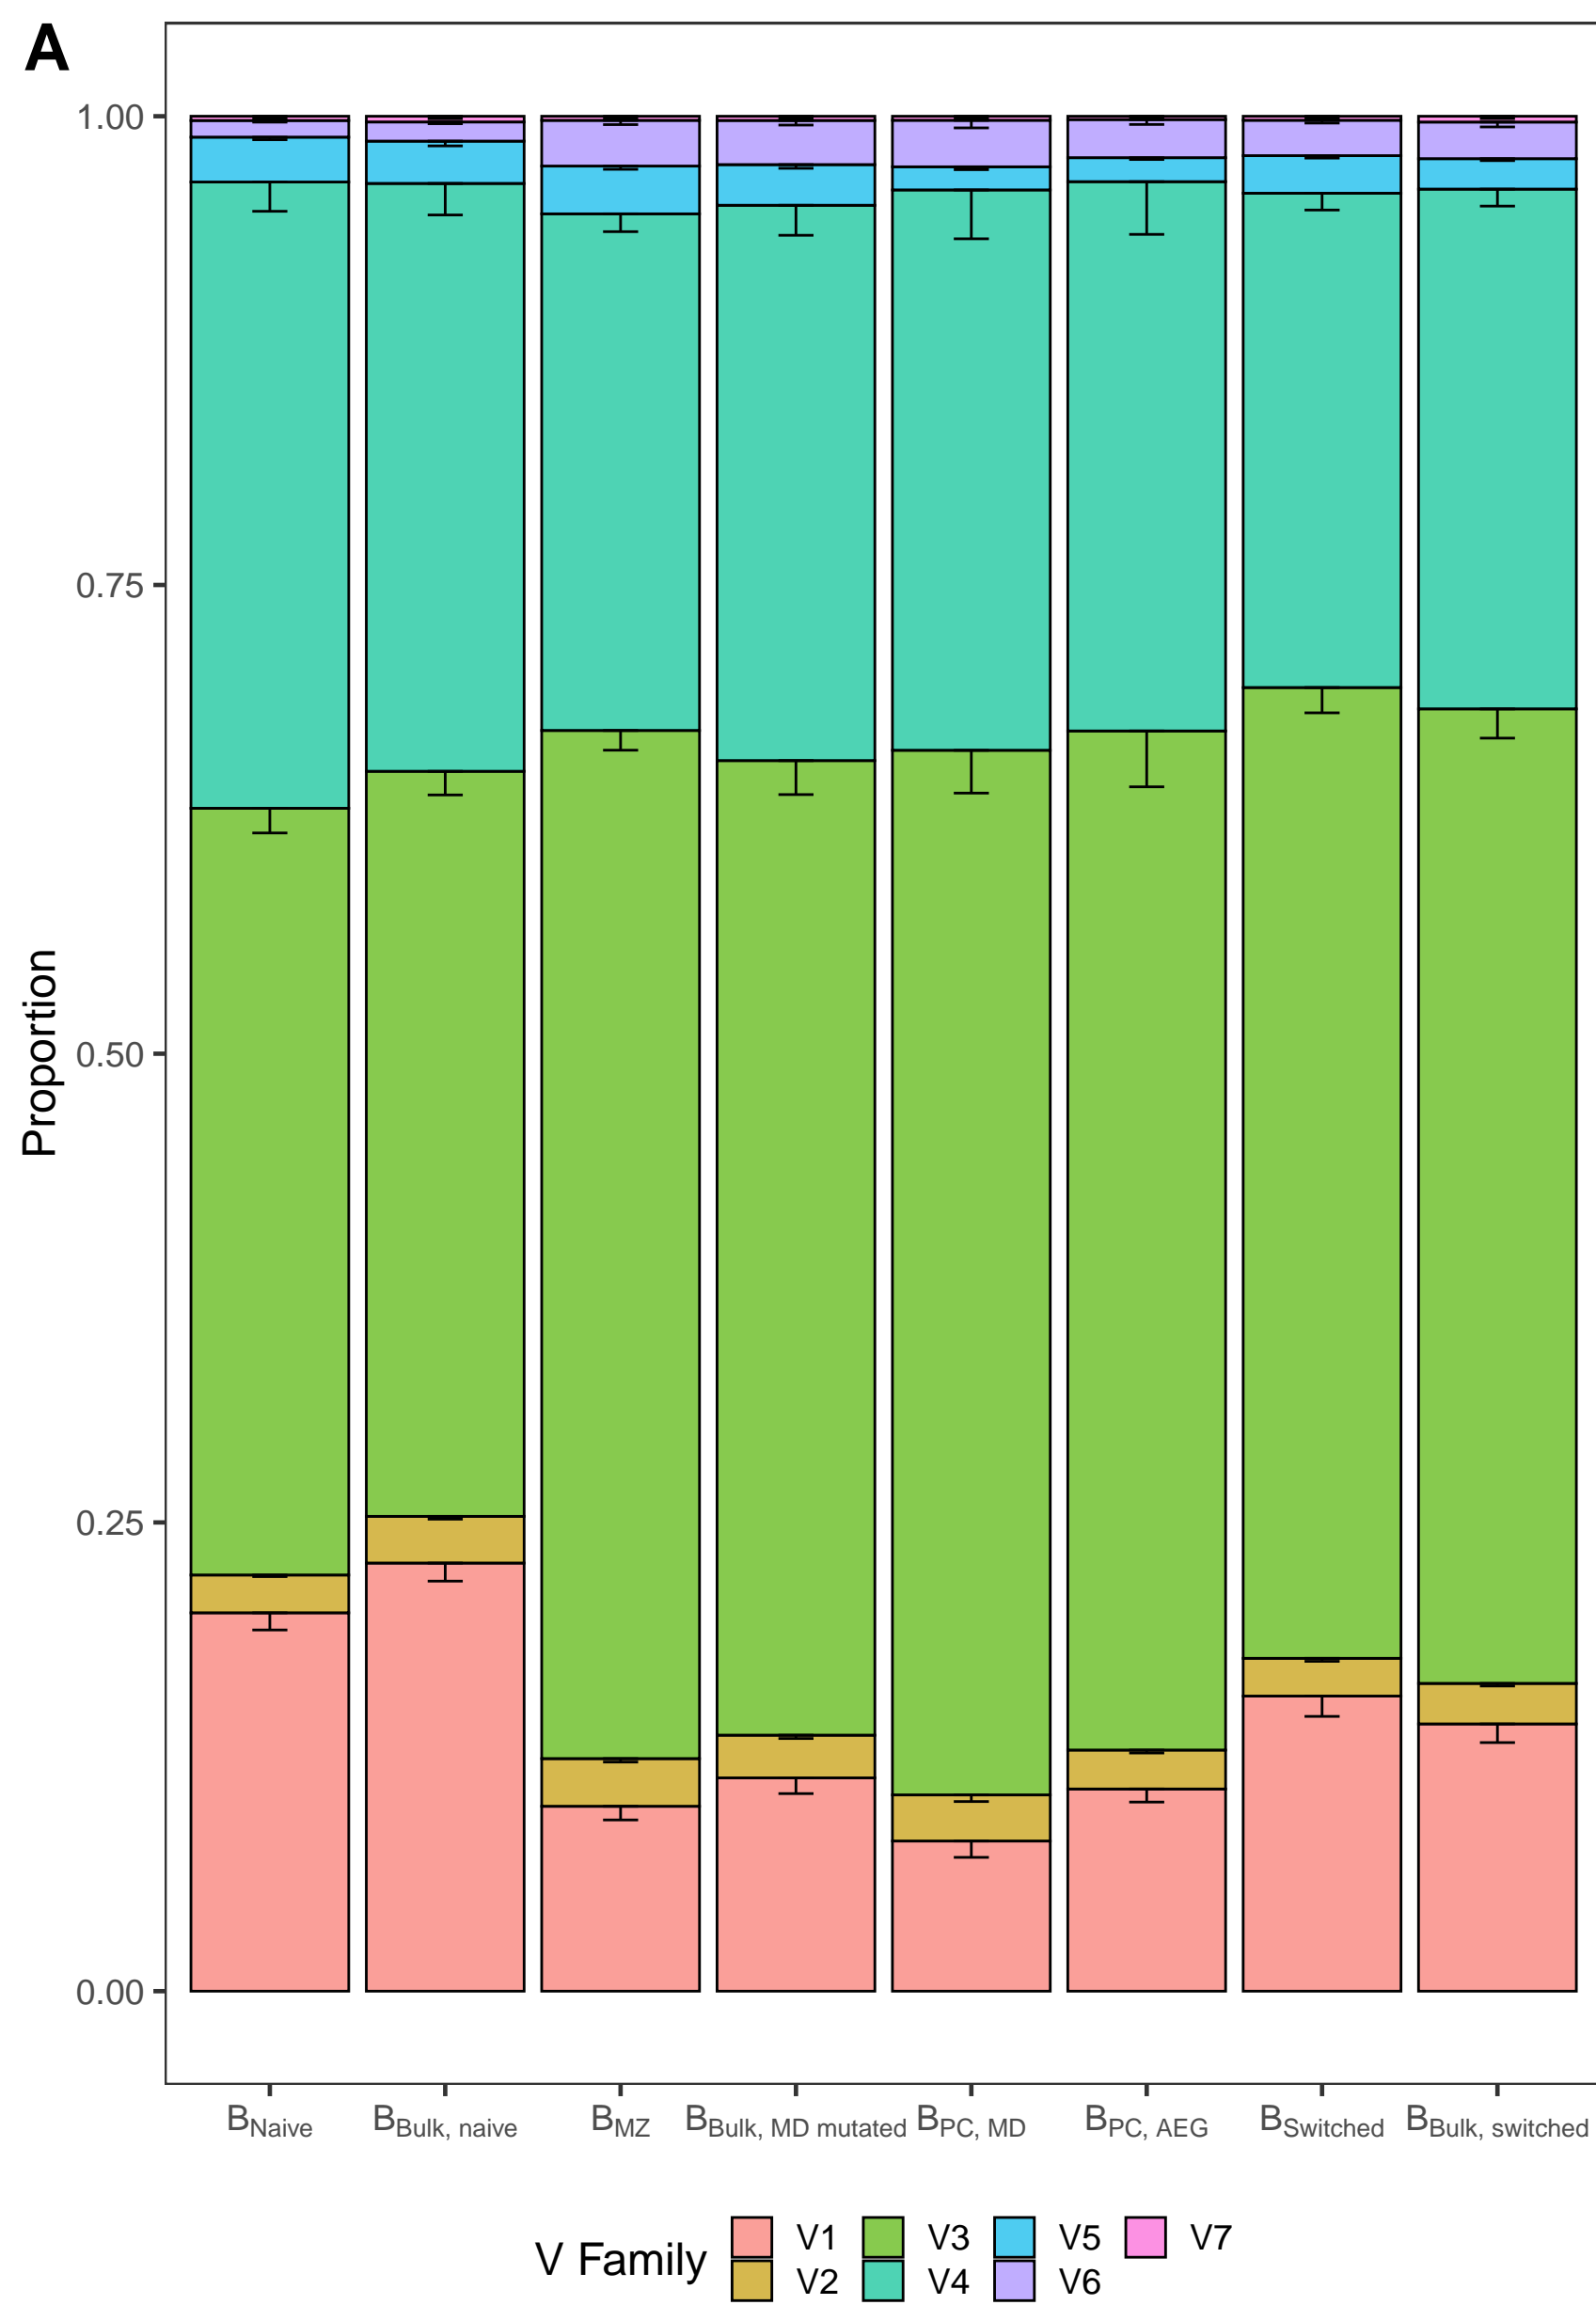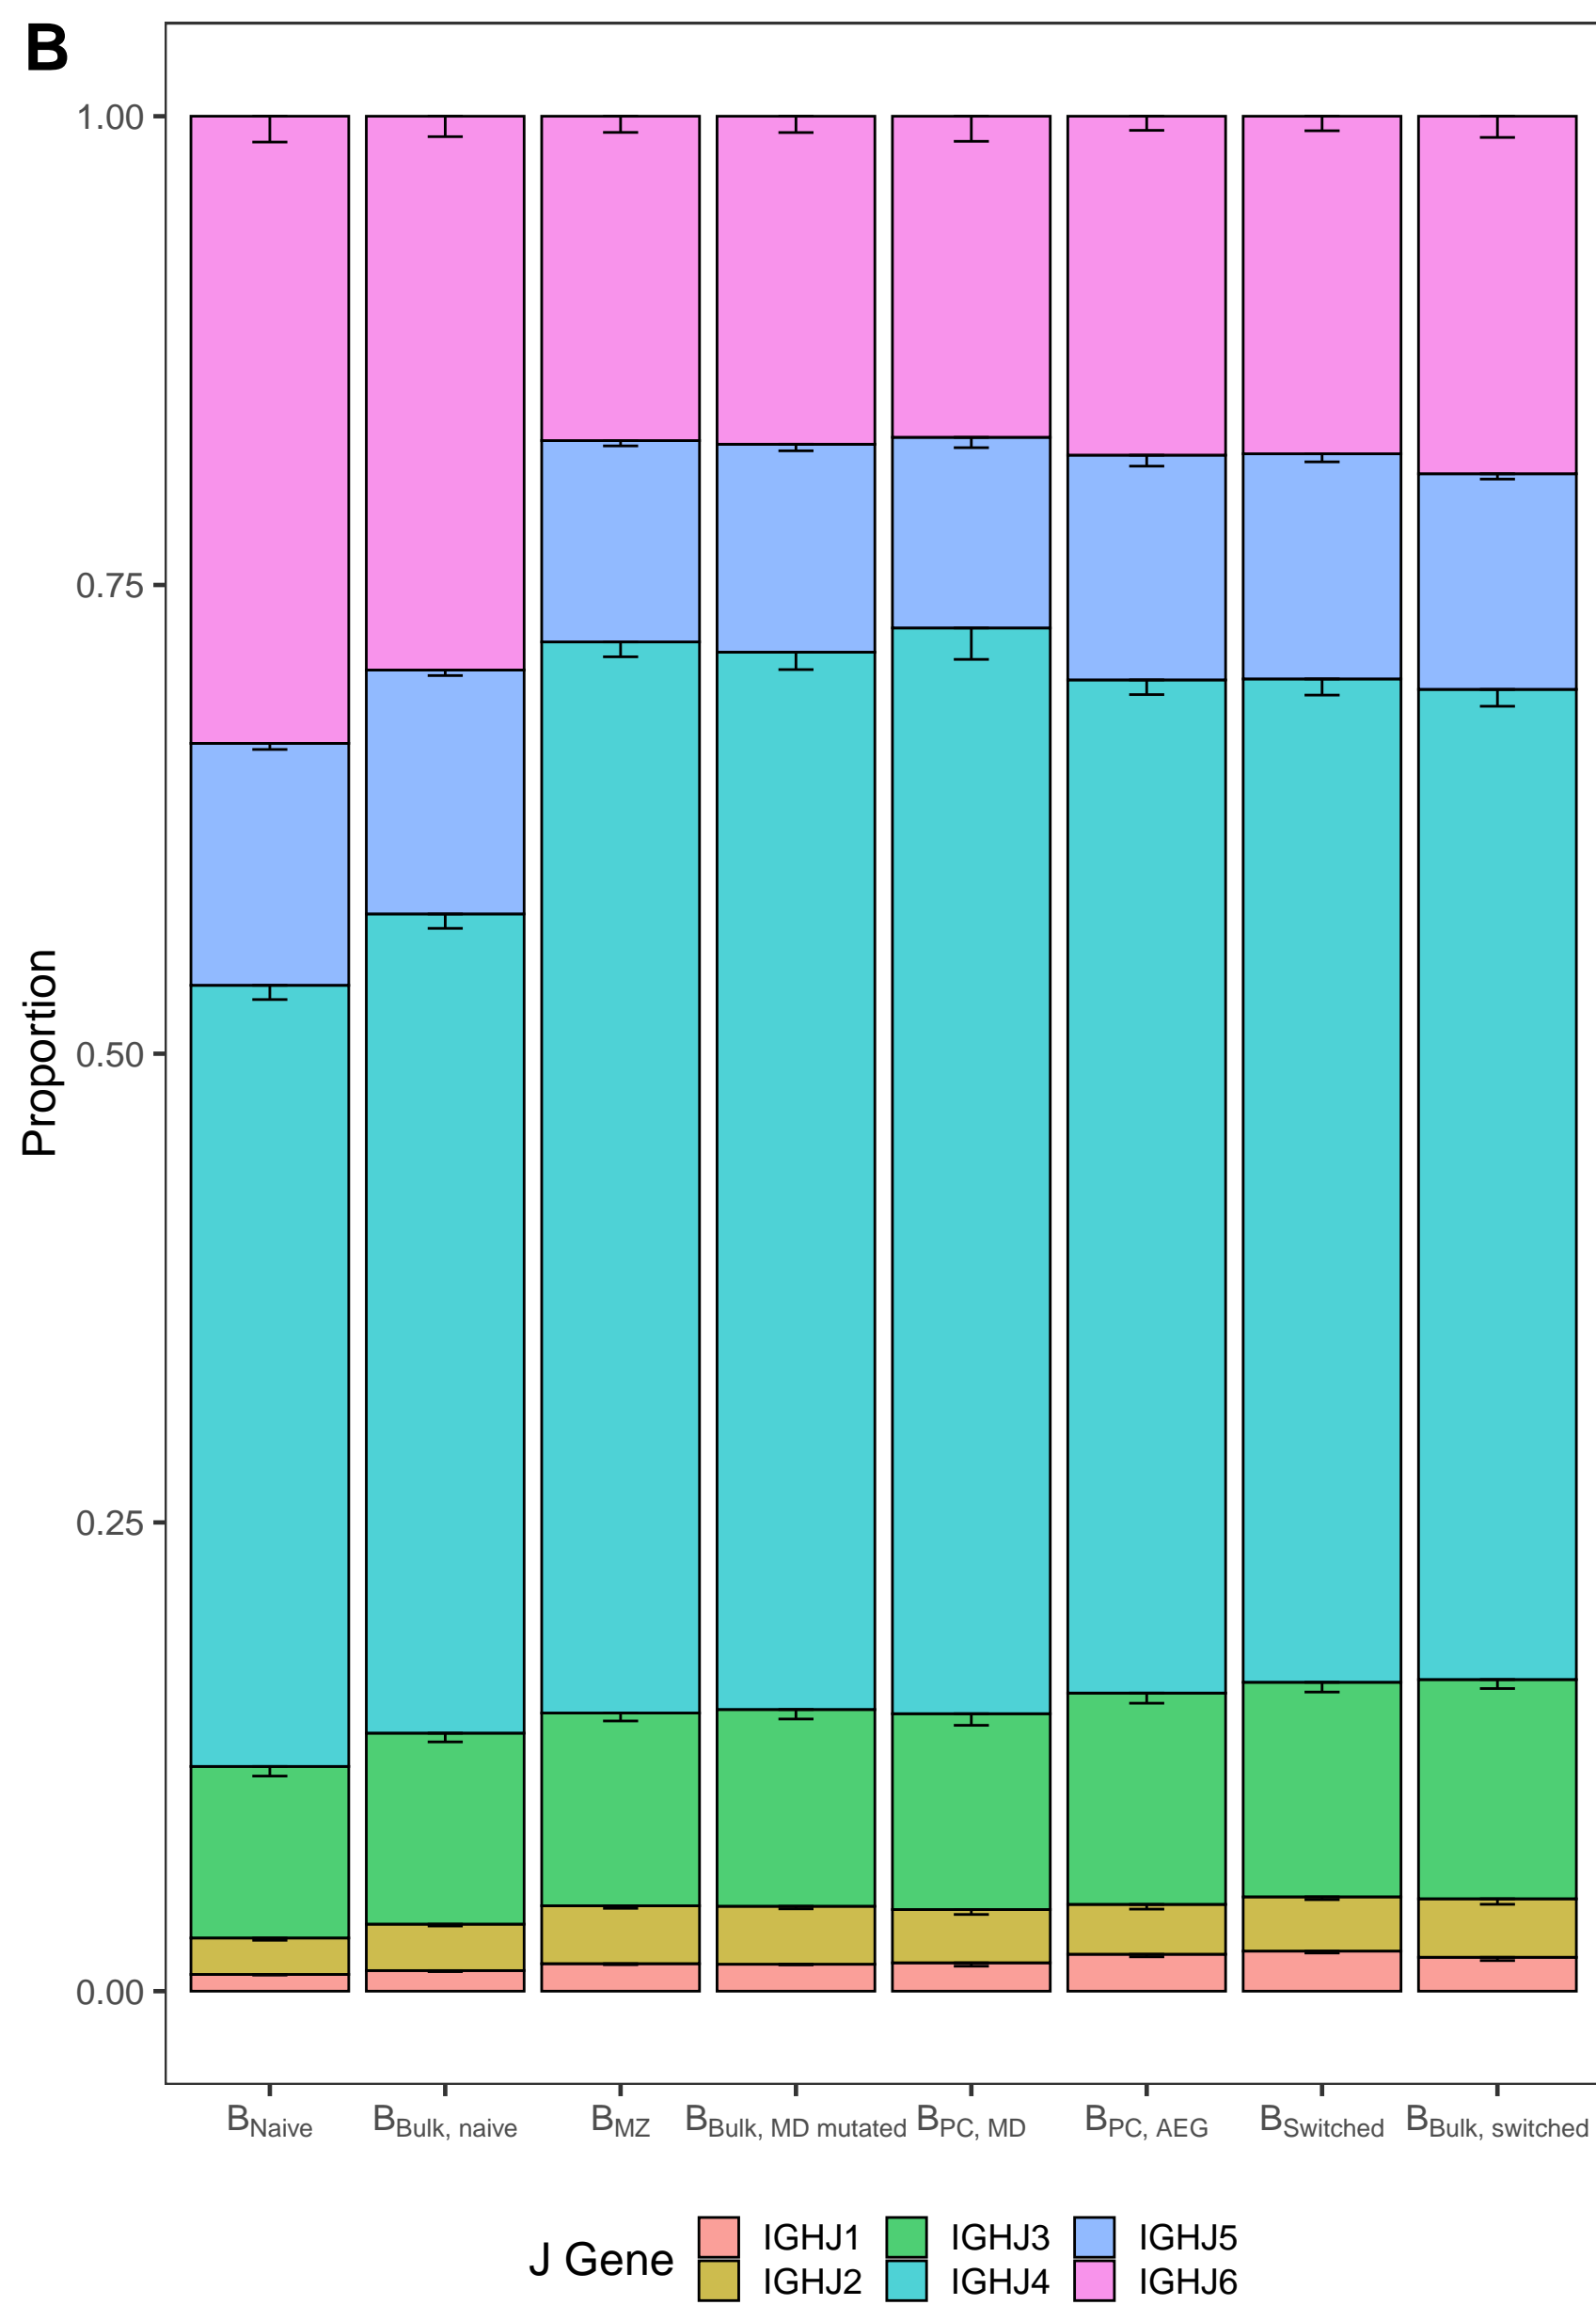

Supplement: supp [file elife_poa_e73111_Figure_1_figure_supplement_1.pdf › elife_poa_e73111_Figure_1_figure_supplement_1.pdf]

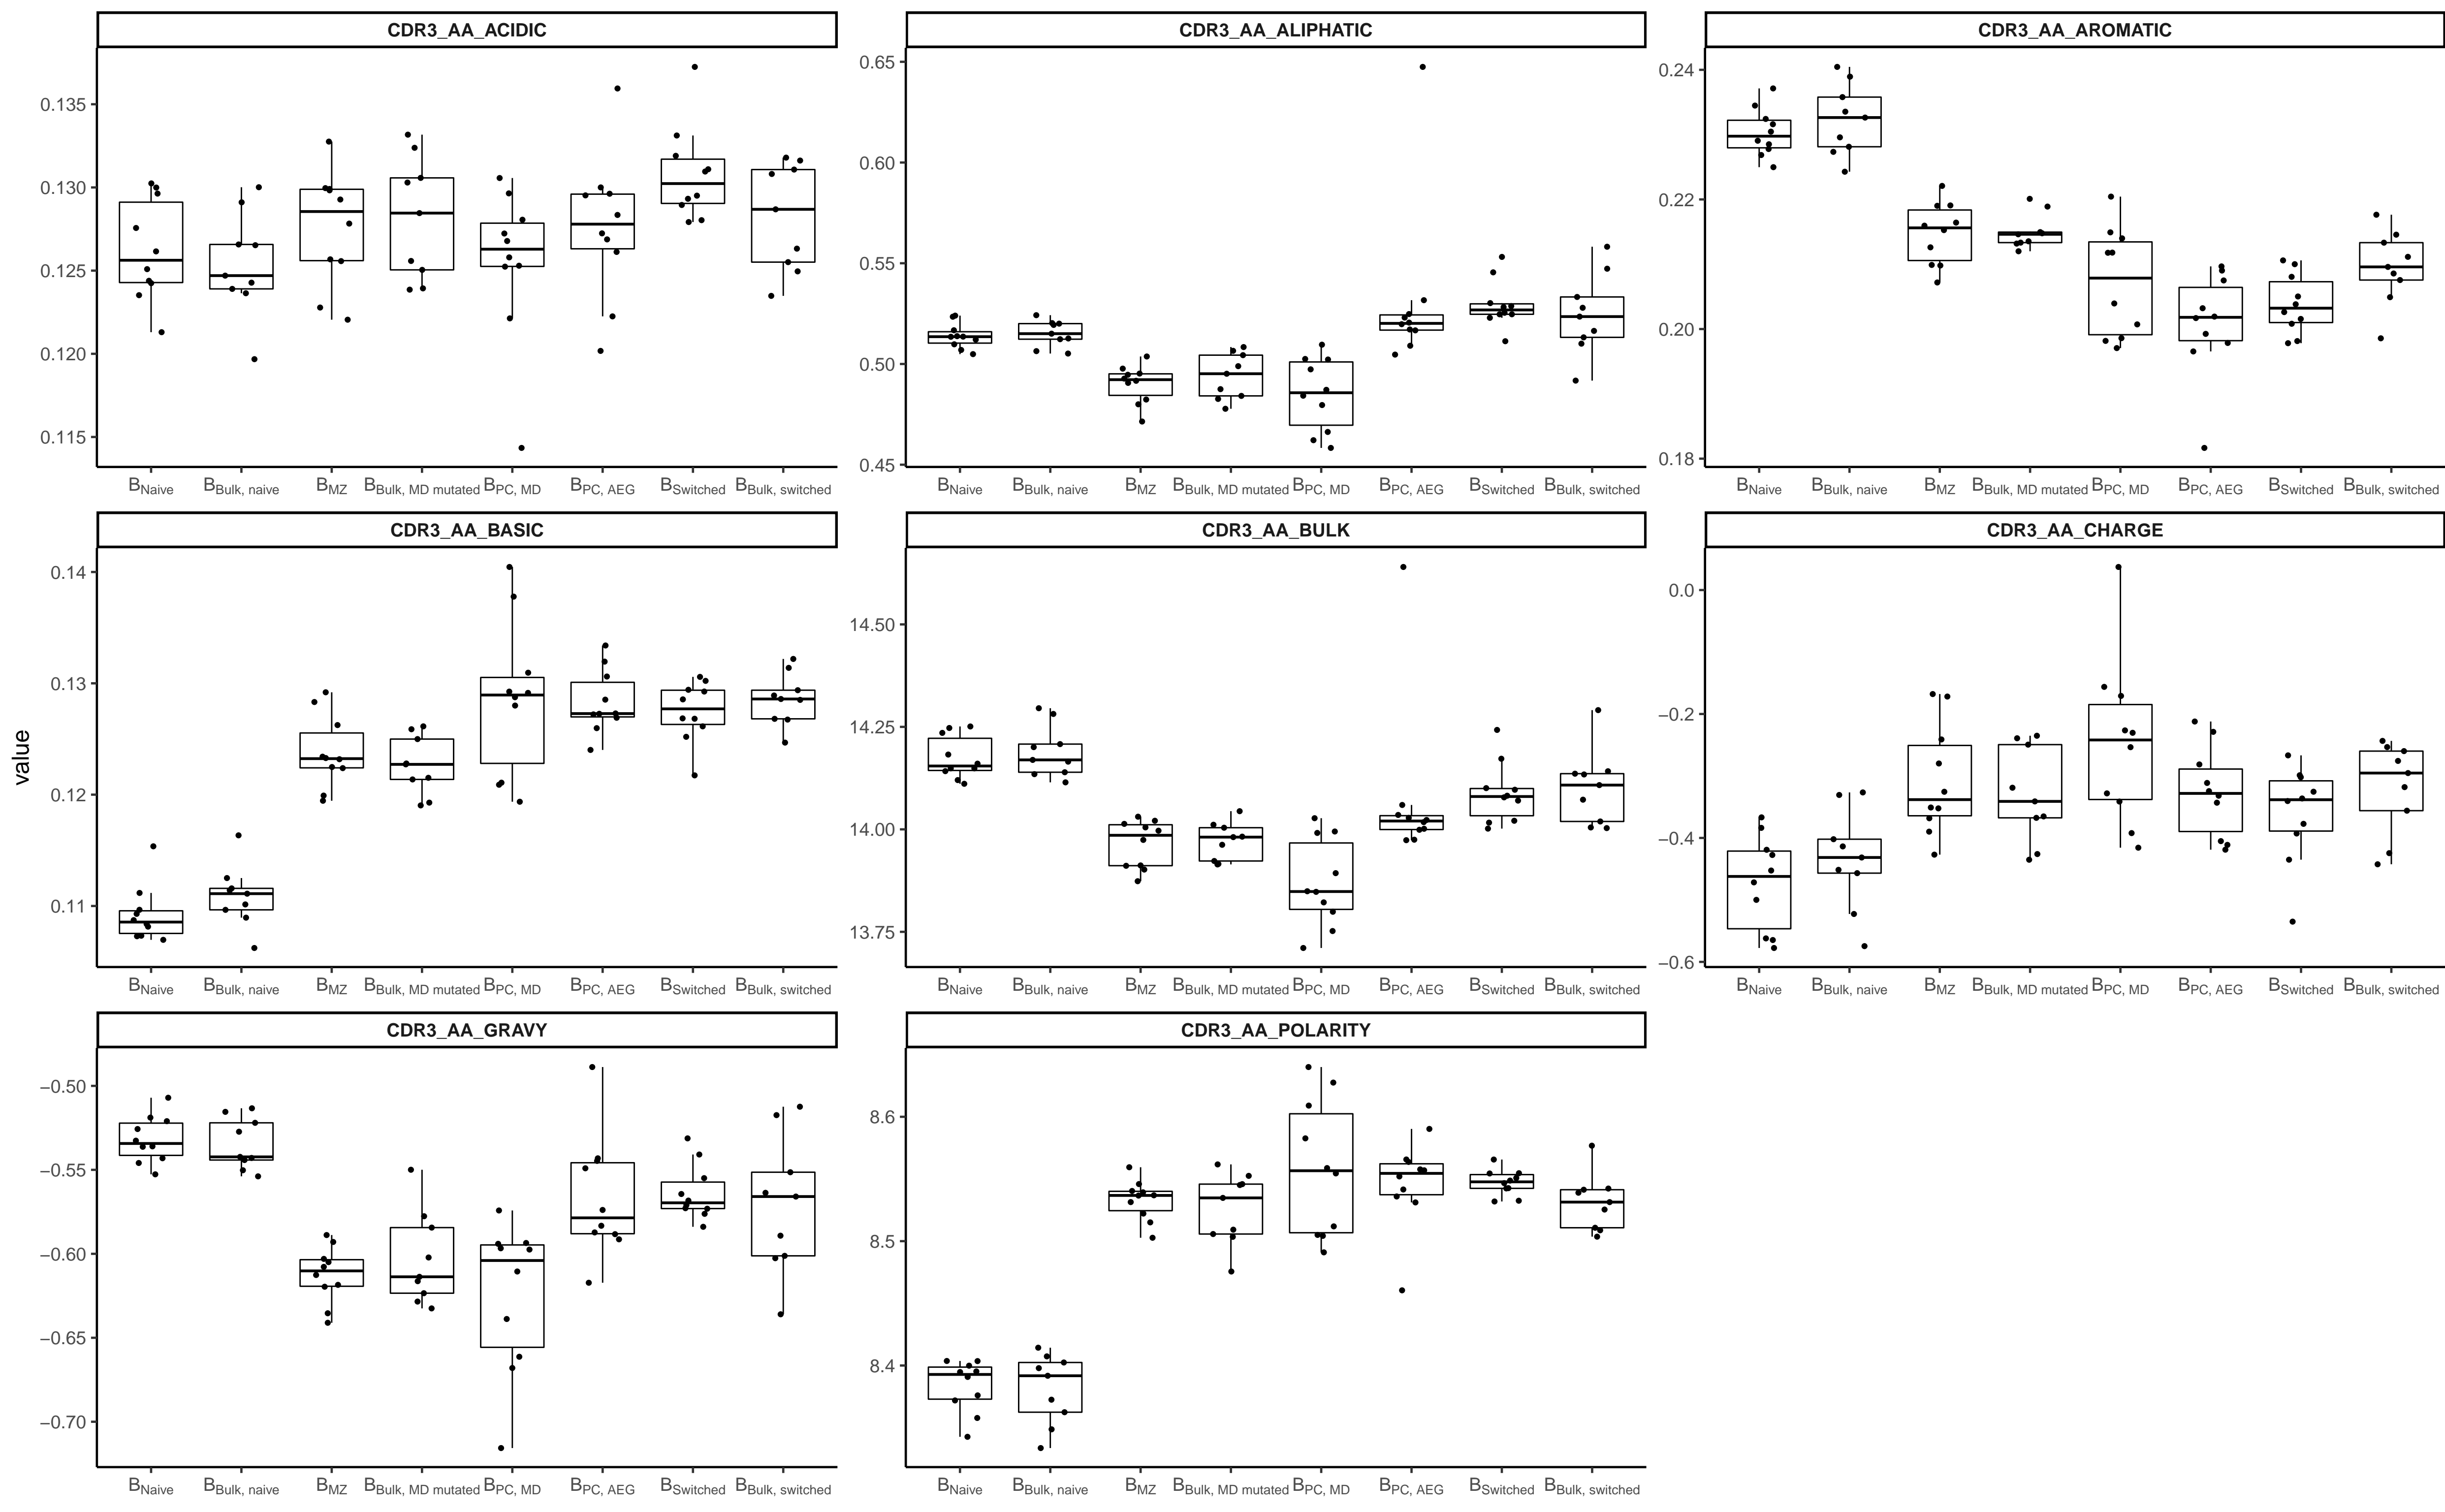

Supplement: supp [file elife_poa_e73111_Figure_1_figure_supplement_2.pdf › elife_poa_e73111_Figure_1_figure_supplement_2.pdf]

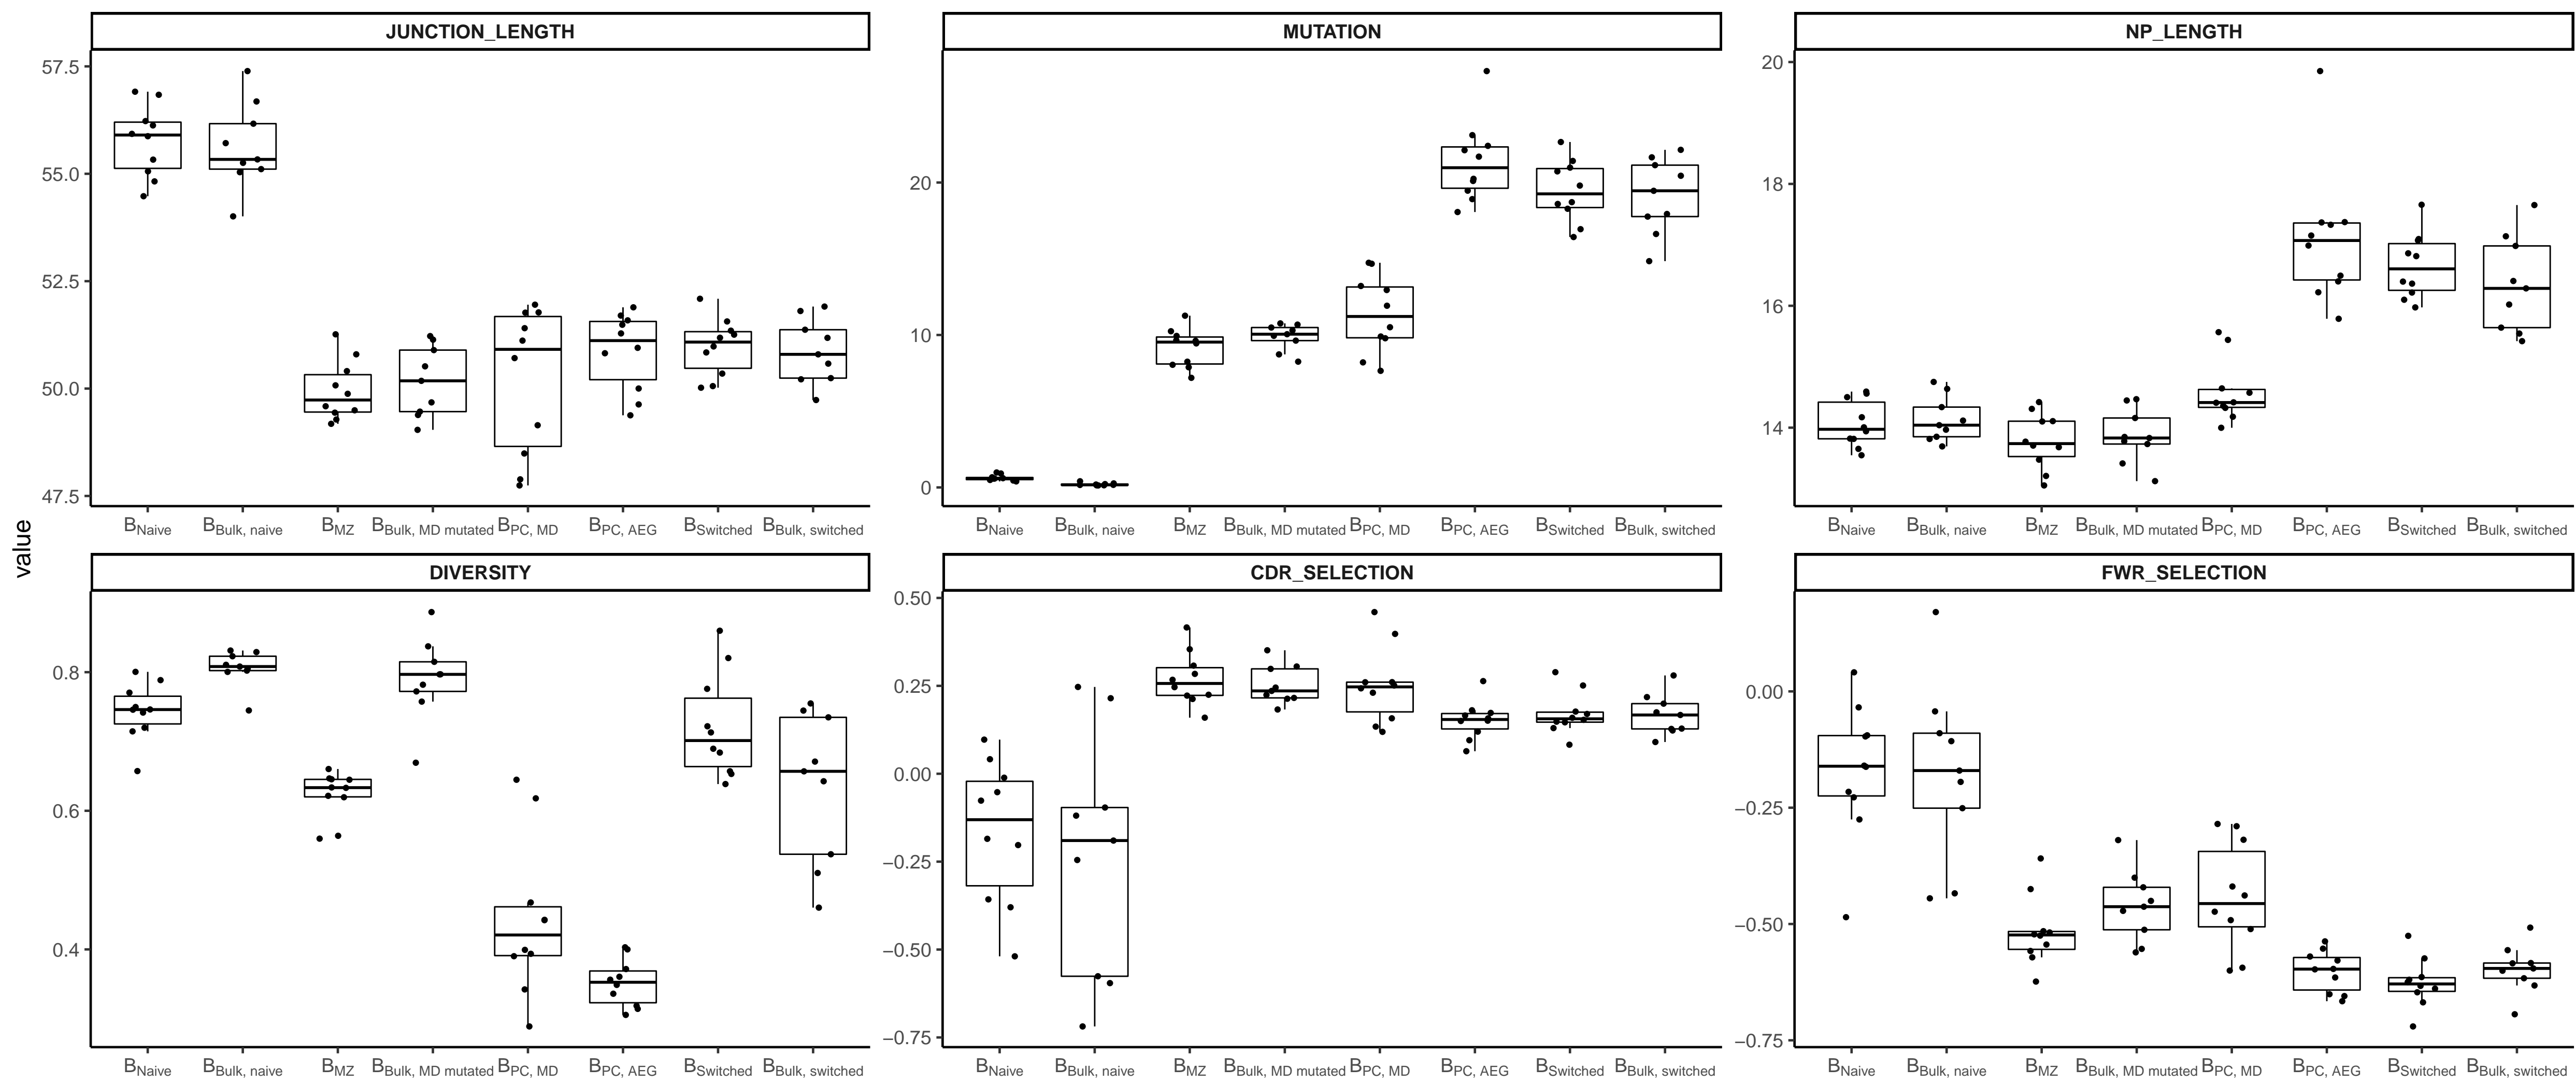

Supplement: supp [file elife_poa_e73111_Figure_1_figure_supplement_3.pdf › elife_poa_e73111_Figure_1_figure_supplement_3.pdf]

**A**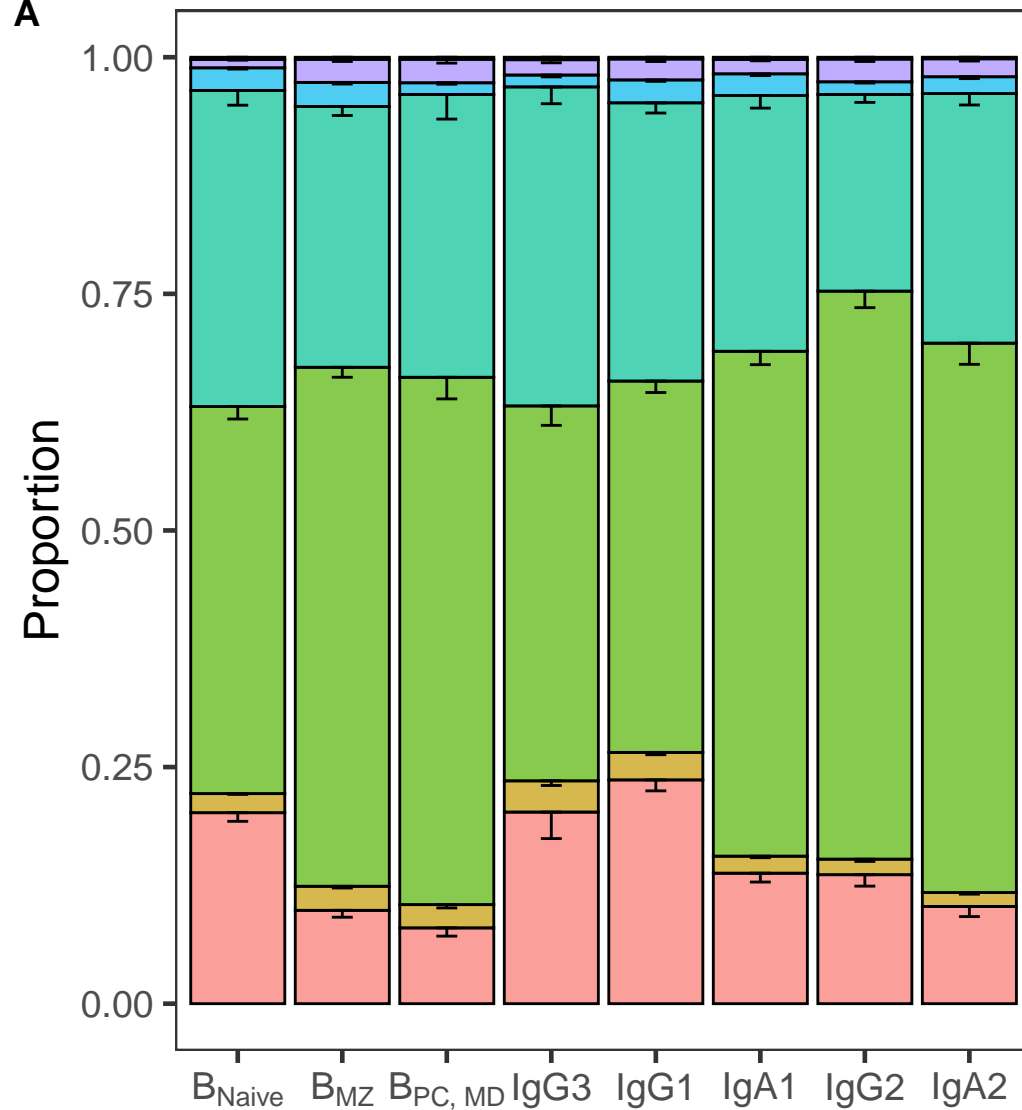**V Family**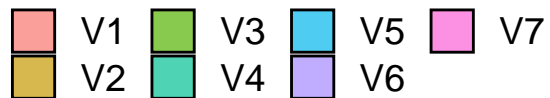**B**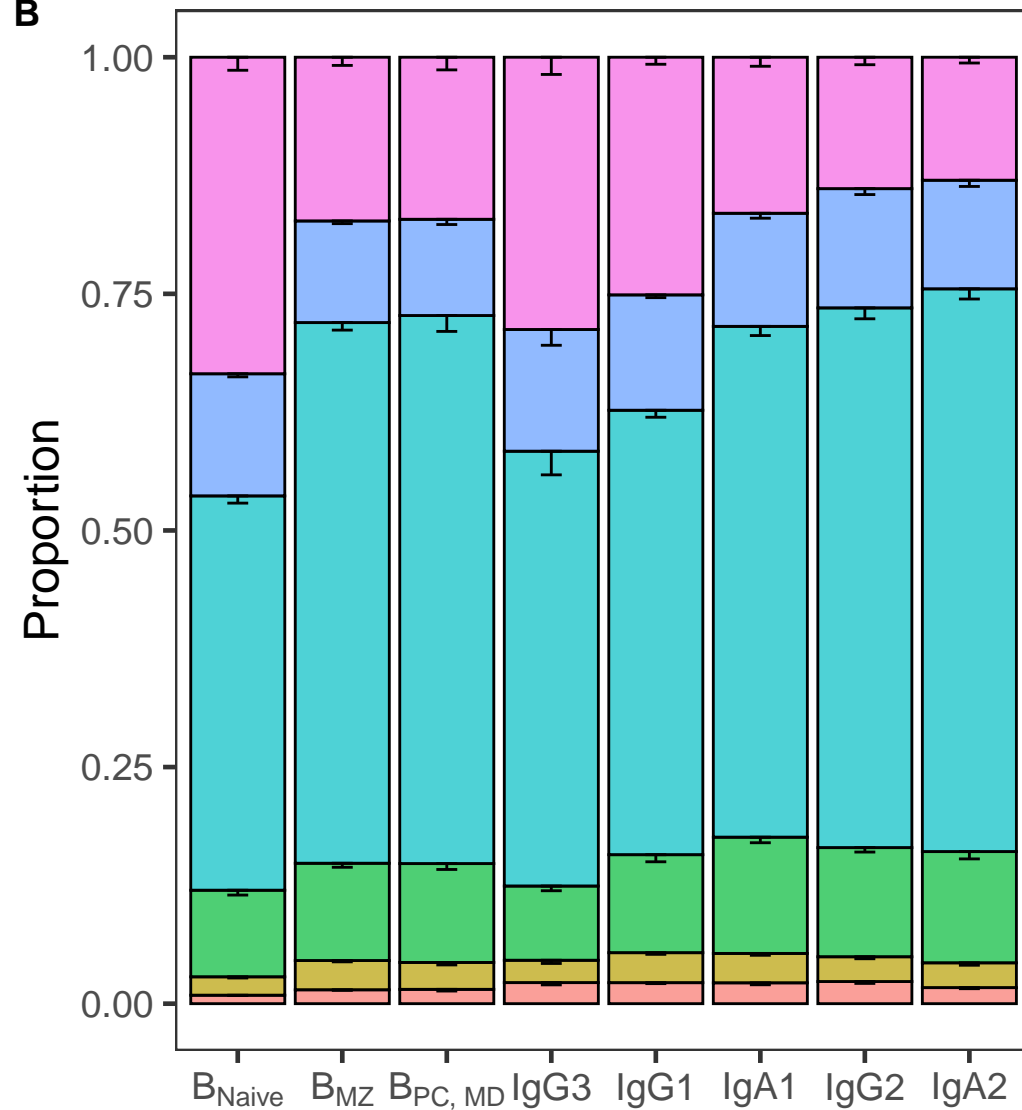**J Gene**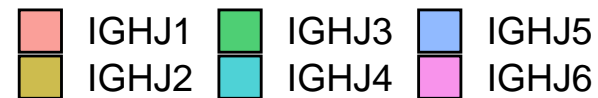

Supplement: supp [file elife_poa_e73111_Figure_1_figure_supplement_4.pdf › elife_poa_e73111_Figure_1_figure_supplement_4.pdf]
